University of California, San Diego  
San Diego, California 92103

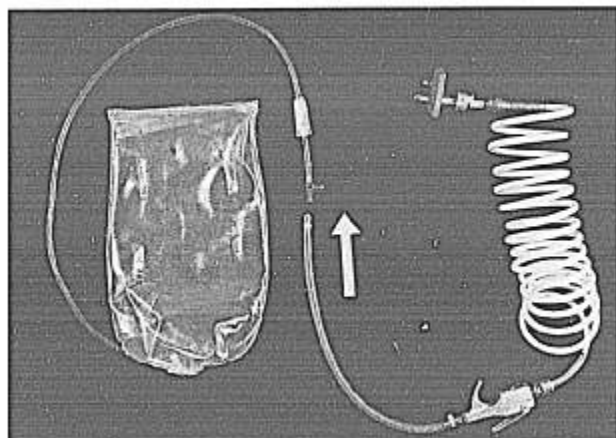

FIG. 1. The high pressure uterine displacer. The arrow indicates attachment of the jet ventilator to the inflatable bag.

#### REFERENCES

1. Redick LF: An inflatable wedge for prevention of aortocaval compression during pregnancy. *Am J Obstet Gynecol* 133:458-459, 1979
2. Millar WL: Management of a difficult airway in obstetrics. *ANESTHESIOLOGY* 52:523-524, 1980
3. Thomas TC, Zornow MH, Scheller MS, Unger RJ: The efficacy of three different modes of percutaneous trans-tracheal ventilation in hypoxic, hypercarbic swine. *Can J Anaesth* 35:S61-S63, 1988
4. Endler GC, Donath RW: Inflation device to prevent aortocaval compression during pregnancy. *Anesth Analg* 64:1015-1016, 1985

(Accepted for publication September 14, 1988.)

Anesthesiology  
70:166, 1989

### Calculating the Potency of Mivacurium

*To the Editor:*—I am confused by some of the results reported by Savarese *et al.*<sup>1</sup> in their recent paper on the pharmacology of mivacurium. Specifically, using the data supplied in table 1, I cannot reproduce the ED<sub>95</sub> value of 0.081 mg/kg that they calculate. If one performs a log dose-probit transformation and linear regression analysis on only the first four groups (0.03–0.10 mg/kg), the resulting ED<sub>50</sub> and ED<sub>95</sub> values are 0.052 and 0.10 mg/kg, respectively (table 1). In fact, this estimate of potency is substantiated by the group of patients receiving 0.10 mg/kg that showed 95.7% twitch depression. If the ED<sub>95</sub> was, in reality, 0.081 mg/kg, then a dose of 0.10 mg/kg should produce greater than 99% twitch depression; this was not the case.

The authors do not actually state in their paper which groups were employed in calculating the ED<sub>50</sub> and ED<sub>95</sub> values. However, since 100% twitch suppression cannot be plotted on a log-probit graph, it appears that only the first four groups (n = 36) could have been used. It would be helpful if the authors could explain in greater detail how they estimated drug potency.

AARON F. KOPMAN, M.D.  
Department of Anesthesiology  
Long Island Jewish Medical Center  
New Hyde Park, New York 11042

Anesthesiology  
70:166–167, 1989

*In Reply:*—We appreciate the comments offered by Dr. Kopman. His letter reflects the need for a solution to a debatable question: How does one handle 100% or 0% twitch inhibition during construction of a dose-response curve for a neuromuscular blocking drug?

In our publication on mivacurium,<sup>1</sup> we estimated potency of mivacurium during nitrous oxide-narcotic-barbiturate anesthesia using single-twitch stimulation of the ulnar nerve to evoke thumb adduction at

TABLE 1. Log-probit Transformation of Data from Table 1 of Savarese *et al.*<sup>1</sup>

| Dose (mg/kg) | % Effect | Log-dose | Probit  |
|--------------|----------|----------|---------|
| 0.03         | 9.4      | -1.5228  | -1.3106 |
| 0.05         | 43.7     | -1.3010  | -0.1637 |
| 0.07         | 75.3     | -1.1549  | 0.6280  |
| 0.10         | 95.7     | -1.0000  | 1.6955  |

Equation for the dose-response relationship as determined by linear regression (least squares) analysis of the above log-probit data:  $y = 5.8598x + 7.513$ ,  $r = 0.998$ .

#### REFERENCE

1. Savarese JJ, Ali HH, Basta SJ, Embree PB, Scott RPF, Sunder N, Weakly JN, Wastila WB, El-Sayad HA: The clinical neuromuscular pharmacology of mivacurium chloride (BW B1090U): A short-acting nondepolarizing ester neuromuscular blocking drug. *ANESTHESIOLOGY* 68:723-732, 1988

(Accepted for publication September 15, 1988.)

0.15 Hz. This stimulus parameter was used so that the characteristics of mivacurium block might be easily compared with past literature on other relaxants. The methodology is fairly extensively presented and debated in Donlon *et al.*<sup>2</sup> where both single-bolus and cumulative dose-response curves for pancuronium were constructed.

Although we calculated an ED<sub>95</sub> of 0.081 mg/kg in our paper, when we administered 0.10 mg/kg to nine consecutive patients, we observed
